# Supplementary material
Source: publisher figshare collection journal article supplement (https://acs.figshare.com/ndownloader/files/5779164)
Supplement: Supplementary file 1 [file 5779164]

S1

**Supporting information:*****Preparation of (+)-2,5-dimethylthiolane 2 and (-)-2,5-dimethylsulfolane 3:***

**(+)-2,5-Dimethylthiolane 2:** To a solution of (+)-(2*S*, 5*S*)-2,5-hexanediol (4.0 g, 33.6 mmol) in CH<sub>2</sub>Cl<sub>2</sub> (60 mL) was added dried triethylamine (11.7 mL, 84.0 mmol). The solution was cooled to -15 °C, and methanesulfonyl chloride (5.8 mL, 75.6 mmol) was added dropwise with vigorous stirring over 90 min while the temperature was maintained between -20 and -15 °C. After the addition was complete, the mixture was allowed to warm to 0 °C and then poured into cold 1 N HCl (40 mL). The organic layer was separated, and aqueous layer extracted three times with CH<sub>2</sub>Cl<sub>2</sub> (30 mL). The combined organic extracts were washed with NaHCO<sub>3</sub> (40 mL), dried with MgSO<sub>4</sub>, filtered and concentrated. The resulting oil product, (2*S*, 5*S*)-2,5-hexanediol dimethansulfonate (9.05 g), was found to be homogeneous by TLC and <sup>1</sup>H NMR and was used without further purification (Zwaagstra, M. E.; Meetsma, A.; Feringa, B. L. *Tetrahedron: Asymmetry* **1993**, *4*, 2163).

A solution of sodium sulfide nonahydrate (12.5 g, 37.0 mmol) in ethanol (150 mL) was prepared. This solution (75 mL) was then placed in a 500 mL three-necked flask equipped with two dropping funnels and a condenser. The solution was heated to reflux and the remaining solution and a solution of (2*S*, 5*S*)-2,5-hexanediol dimethansulfonate (9.05 g) in 30 mL dimethylformamide (DMF) were simultaneously added from the two addition funnels over a period of 1.5 h. The mixture was heated and refluxed for 40 h. After cooling to room temperature, the mixture was diluted with cold water and extracted with three portions of methylene chloride. The combined organic layers were washed

S2

with 1 N HCl (50 mL) and five times with saturated brine (5X50 mL), dried over  $\text{MgSO}_4$ , and concentrated. The residue was distilled under vacuum to obtain (+)-2,5-dimethylthiolane **2** (1.76 g, 45% yield (Eliel, E. L.; Hutchins, R. O.; Mebane, R.; Willer, R. L. *J. Org. Chem.* **1976**, *41*, 1052),  $[\alpha]_{\text{D}}^{20} + 139$  ( $c$  1.22, diethyl ether) [lit.<sup>8</sup> +169.6 ( $c$  1.1, diethyl ether)]; GC-MS:  $\text{M}^+$  116;  $^1\text{H}$  NMR ( $\text{CDCl}_3$ ):  $\delta$  1.30 (d,  $J=6.7$  Hz, 6H); 1.51-1.56 (m, 2H,  $\text{CH}_2$ ); 2.17-2.22 (m, 2H,  $\text{CH}_2$ ); 3.53-3.62 (m, 2H, CH)).

**(-)-2,5-Dimethylsulfolane 3:** To a solution of *m*-chloroperbenzoic acid (1.04 g, 6.0 mmol) in dried methylene chloride (20 mL) was added **2** (0.31 g, 2.67 mmol) at 0  $^\circ\text{C}$ . After stirring for 48 h, the solid was filtered off and the organic layer washed twice with diluted  $\text{NaHCO}_3$  and then with saturated brine, dried over  $\text{MgSO}_4$  and concentrated. The residue was purified by flash chromatography on silica, eluting with 1% to 5% ethyl acetate in hexane to afford **3** (0.37 g, 94% yield<sup>8</sup> as an oil,  $[\alpha]_{\text{D}}^{20} -14.0$  ( $c=1.05$ , diethyl ether) [lit.<sup>8b</sup> -13.6 ( $c=1.0$ , diethyl ether)]; GC-MS:  $\text{M}^+$  148;  $^1\text{H}$  NMR( $\text{CDCl}_3$ ):  $\delta$  1.37 (d,  $J=6.7$  Hz, 6H); 1.50-1.70 (m, 2H,  $\text{CH}_2$ ); 2.21-2.38 (m, 2H,  $\text{CH}_2$ ); 2.91-3.05 (m, 2H, CH)).

***Cartesian coordinates for the two conformations of (2R,5R)-2,5-dimethylthiolane 2 and (2R,5R)-2,5-dimethylsulfolane 3***

| Center<br>Number | Atomic<br>Number | Atomic<br>Type | Coordinates (Angstroms) |           |           |
|------------------|------------------|----------------|-------------------------|-----------|-----------|
|                  |                  |                | X                       | Y         | Z         |
| thiolane 2a      |                  |                |                         |           |           |
| 1                | 16               | 0              | -0.000031               | -1.188501 | -0.000086 |
| 2                | 6                | 0              | 1.303577                | 0.071466  | -0.419409 |
| 3                | 6                | 0              | -1.303513               | 0.071495  | 0.419417  |
| 4                | 6                | 0              | 0.754812                | 1.398753  | 0.113626  |
| 5                | 6                | 0              | -0.754786               | 1.398752  | -0.113717 |
| 6                | 6                | 0              | 2.667172                | -0.317659 | 0.135568  |
| 7                | 6                | 0              | -2.667197               | -0.317629 | -0.135355 |
| 8                | 1                | 0              | 1.357108                | 0.114177  | -1.507611 |
| 9                | 1                | 0              | -1.356907               | 0.114258  | 1.507627  |
| 10               | 1                | 0              | 1.244881                | 2.242052  | -0.377836 |

## S3

|    |   |   |           |           |           |
|----|---|---|-----------|-----------|-----------|
| 11 | 1 | 0 | 0.970036  | 1.474558  | 1.182591  |
| 12 | 1 | 0 | -1.244843 | 2.242083  | 0.377704  |
| 13 | 1 | 0 | -0.970025 | 1.474485  | -1.182683 |
| 14 | 1 | 0 | 3.000575  | -1.277787 | -0.257754 |
| 15 | 1 | 0 | 2.637060  | -0.391091 | 1.222618  |
| 16 | 1 | 0 | 3.413868  | 0.430507  | -0.141459 |
| 17 | 1 | 0 | -3.000530 | -1.277763 | 0.258011  |
| 18 | 1 | 0 | -2.637251 | -0.391049 | -1.222410 |
| 19 | 1 | 0 | -3.413854 | 0.430528  | 0.141797  |

## thiolane 2b

|    |    |   |           |           |           |
|----|----|---|-----------|-----------|-----------|
| 1  | 16 | 0 | 0.000015  | -1.296166 | 0.000046  |
| 2  | 6  | 0 | -1.254168 | -0.042589 | 0.561286  |
| 3  | 6  | 0 | 1.254146  | -0.042473 | -0.561340 |
| 4  | 6  | 0 | -0.493808 | 1.290822  | 0.585388  |
| 5  | 6  | 0 | 0.493747  | 1.290903  | -0.585220 |
| 6  | 6  | 0 | -2.491972 | -0.034820 | -0.332839 |
| 7  | 6  | 0 | 2.492027  | -0.034834 | 0.332651  |
| 8  | 1  | 0 | -1.543801 | -0.329482 | 1.570910  |
| 9  | 1  | 0 | 1.543615  | -0.329334 | -1.571017 |
| 10 | 1  | 0 | 0.049166  | 1.384516  | 1.526860  |
| 11 | 1  | 0 | -1.188418 | 2.131081  | 0.527848  |
| 12 | 1  | 0 | -0.049225 | 1.384760  | -1.526676 |
| 13 | 1  | 0 | 1.188346  | 2.131167  | -0.527552 |
| 14 | 1  | 0 | -3.239928 | 0.656430  | 0.064601  |
| 15 | 1  | 0 | -2.943317 | -1.024740 | -0.385760 |
| 16 | 1  | 0 | -2.247619 | 0.270317  | -1.350112 |
| 17 | 1  | 0 | 2.943349  | -1.024770 | 0.385441  |
| 18 | 1  | 0 | 2.247784  | 0.270230  | 1.349973  |
| 19 | 1  | 0 | 3.239974  | 0.656424  | -0.064801 |

## sulfolane 3a

|    |    |   |           |           |           |
|----|----|---|-----------|-----------|-----------|
| 1  | 16 | 0 | 0.000009  | -0.778802 | 0.000026  |
| 2  | 6  | 0 | 1.296544  | 0.452156  | -0.474641 |
| 3  | 6  | 0 | -1.296590 | 0.452132  | 0.474607  |
| 4  | 6  | 0 | 0.764774  | 1.776221  | 0.080035  |
| 5  | 6  | 0 | -0.764801 | 1.776227  | -0.079986 |
| 6  | 6  | 0 | 2.677131  | 0.032481  | 0.001257  |
| 7  | 6  | 0 | -2.677131 | 0.032452  | -0.001421 |
| 8  | 1  | 0 | 1.241568  | 0.453487  | -1.563240 |
| 9  | 1  | 0 | -1.241706 | 0.453428  | 1.563209  |
| 10 | 1  | 0 | 1.222474  | 2.619063  | -0.437927 |
| 11 | 1  | 0 | 1.029402  | 1.863080  | 1.136504  |
| 12 | 1  | 0 | -1.222502 | 2.619041  | 0.438023  |
| 13 | 1  | 0 | -1.029422 | 1.863153  | -1.136451 |
| 14 | 1  | 0 | 2.978191  | -0.916888 | -0.438964 |
| 15 | 1  | 0 | 2.698097  | -0.076800 | 1.083909  |
| 16 | 1  | 0 | 3.410292  | 0.786806  | -0.288618 |
| 17 | 1  | 0 | -2.978214 | -0.916938 | 0.438741  |
| 18 | 1  | 0 | -2.698007 | -0.076794 | -1.084078 |
| 19 | 1  | 0 | -3.410327 | 0.786756  | 0.288418  |
| 20 | 8  | 0 | 0.417836  | -1.507844 | 1.189713  |
| 21 | 8  | 0 | -0.417779 | -1.507977 | -1.189594 |

## S4

|              |    |   |           |           |           |
|--------------|----|---|-----------|-----------|-----------|
| sulfolane 3b |    |   |           |           |           |
| 1            | 16 | 0 | 0.000000  | 0.000000  | 0.869561  |
| 2            | 6  | 0 | -0.604614 | 1.253526  | -0.358914 |
| 3            | 6  | 0 | 0.604614  | -1.253526 | -0.358914 |
| 4            | 6  | 0 | 0.000000  | 0.771010  | -1.684514 |
| 5            | 6  | 0 | 0.000000  | -0.771010 | -1.684514 |
| 6            | 6  | 0 | -2.124323 | 1.360067  | -0.349456 |
| 7            | 6  | 0 | 2.124323  | -1.360067 | -0.349456 |
| 8            | 1  | 0 | -0.149356 | 2.181442  | -0.020568 |
| 9            | 1  | 0 | 0.149356  | -2.181442 | -0.020568 |
| 10           | 1  | 0 | 1.021257  | 1.140040  | -1.783237 |
| 11           | 1  | 0 | -0.566387 | 1.164218  | -2.528648 |
| 12           | 1  | 0 | -1.021257 | -1.140040 | -1.783237 |
| 13           | 1  | 0 | 0.566387  | -1.164218 | -2.528648 |
| 14           | 1  | 0 | -2.497552 | 1.587622  | 0.646433  |
| 15           | 1  | 0 | -2.433038 | 2.158797  | -1.025726 |
| 16           | 1  | 0 | -2.597564 | 0.434265  | -0.672713 |
| 17           | 1  | 0 | 2.497552  | -1.587622 | 0.646433  |
| 18           | 1  | 0 | 2.433038  | -2.158797 | -1.025726 |
| 19           | 1  | 0 | 2.597564  | -0.434265 | -0.672713 |
| 20           | 8  | 0 | -1.126161 | -0.566960 | 1.598161  |
| 21           | 8  | 0 | 1.126161  | 0.566960  | 1.598161  |

---
